# Supplementary material for: Effects of Dietary Glucose and Fructose on Copper, Iron, and Zinc Metabolism Parameters in Humans
Source: PubMed Central journal article supplement (PMC7551875; doi:10.3390/nu12092581), 2020-08-25
Supplement: nutrients-12-02581-s001.pdf [file nutrients-12-02581-s001.pdf]

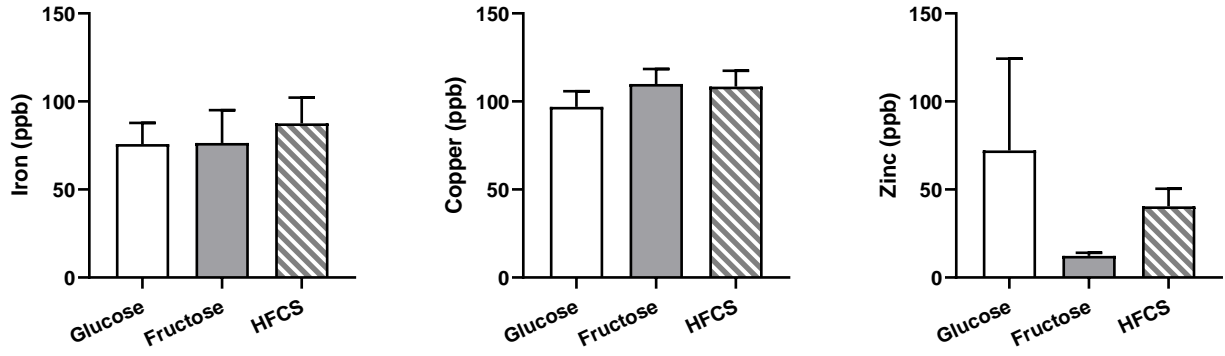

**Figure S1.** Metal concentrations in glucose-, fructose-, or HFCS-sweetened beverages consumed by subjects (n=6). Mean  $\pm$  SEM are shown. One-way ANOVA were used to analyze significance between metal levels in sweetened beverages; no significant differences were found.
